# Supplementary material for: Serotonin Type 3 Receptor Is Potentially Involved in Cellular Stress Induced by Hydrogen Peroxide
Source: MDPI journal article supplement (doi:10.3390/life12101645), 2022-10-19
Supplement: s1 [file s1]

# Serotonin Type 3 Receptor Is Potentially Involved in Cellular Stress Induced by Hydrogen Peroxide

Ana Salomé Correia <sup>1,2,3</sup>, Isabel Silva <sup>4</sup>, José Carlos Oliveira <sup>4,5</sup>, Henrique Reguengo <sup>4,5</sup> and Nuno Vale <sup>1,3,6</sup>

\*

<sup>1</sup> OncoPharma Research Group, Center for Health Technology and Services Research (CINTESIS), Rua Doutor Plácido da Costa, 4200-450 Porto, Portugal

<sup>2</sup> Institute of Biomedical Sciences Abel Salazar (ICBAS), University of Porto, Rua de Jorge Viterbo Ferreira 228, 4050-313 Porto, Portugal

<sup>3</sup> CINTESIS@RISE, Faculty of Medicine, University of Porto, Alameda Professor Hernâni Monteiro, 4200-319 Porto, Portugal

<sup>4</sup> Clinical Chemistry, Department of Laboratory Pathology, Hospital Center of the University of Porto (CHUP), Largo Prof. Abel Salazar, 4099-313 Porto, Portugal

<sup>5</sup> Unit for Multidisciplinary Research in Biomedicine (UMIB), University of Porto, Rua de Jorge Viterbo Ferreira, 228, 4050-313 Porto, Portugal

<sup>6</sup> Department of Community Medicine, Health Information and Decision (MEDCIDS), Faculty of Medicine, University of Porto, Rua Doutor Plácido da Costa, 4200-450 Porto, Portugal

\*Correspondence: nunovale@med.up.pt

## Supplementary Materials

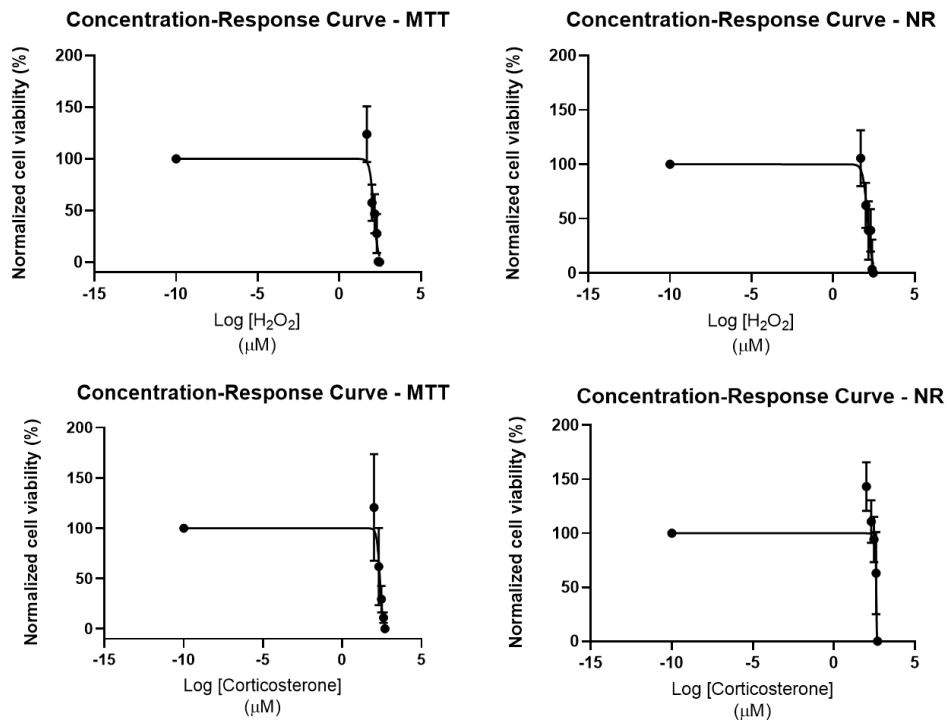

**Figure S1.** Concentration-response curves of H<sub>2</sub>O<sub>2</sub> and corticosterone for SH-SY5Y cells, obtained by MTT (left) and NR (right) assays, for 48h. The results represent the mean ± SEM of 3-6 independent experiments.

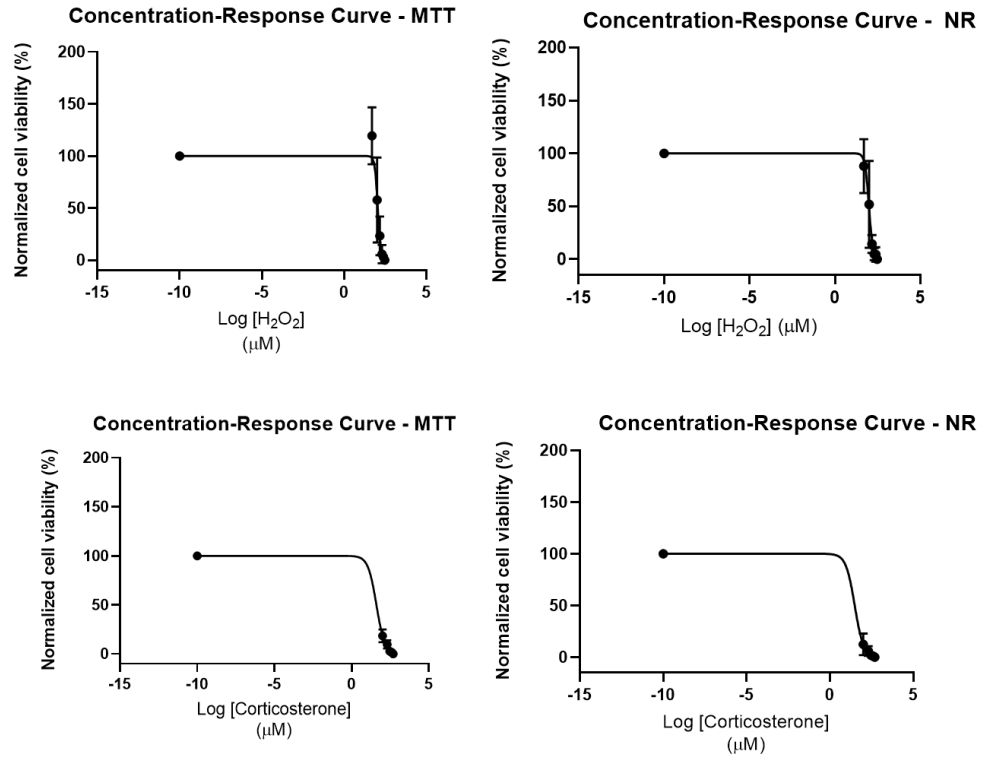

**Figure S2.** Concentration-response curves of  $H_2O_2$  and corticosterone for HT-22 cells, obtained by MTT (left) and NR (right) assays, for 48h. The results represent the mean  $\pm$  SEM of 3-6 independent experiments.
